# Supplementary material for: Pharmacokinetic, partial pharmacodynamic and initial safety analysis of (−)-epicatechin in healthy volunteers
Source: Royal Society of Chemistry journal article supplement (doi:10.1039/c4fo00596a), 2015-01-01

**Pharmacokinetic, partial pharmacodynamic and initial safety analysis of (-)-  
Epicatechin in healthy volunteers**

Christopher F. Barnett <sup>a</sup>, Aldo Moreno-Ulloa <sup>b,c</sup>, Sruti Shiva <sup>d</sup>, Israel Ramirez-Sanchez <sup>b,c</sup>,  
Pam R. Taub <sup>b</sup>, Yongxuan Su <sup>f</sup>, Guillermo Ceballos <sup>c</sup>, Sundeep Durgar <sup>e</sup>, George  
Schreiner <sup>e</sup> and Francisco Villarreal <sup>b</sup>

<sup>a</sup>University of California, San Francisco, <sup>b</sup>University of California, San Diego, School of  
Medicine, <sup>c</sup>Escuela Superior de Medicina del Instituto Politécnico Nacional, Sección de  
Posgrado, Mexico City, Mexico, <sup>d</sup>Department of Pharmacology & Chemical Biology and  
Vascular Medicine Institute, University of Pittsburgh, <sup>e</sup>Cardero Therapeutics, Inc. and  
<sup>f</sup>University of California, San Diego, Chemistry and Biochemistry

Corresponding author/reprint requests:

Francisco Villarreal MD, PhD  
Professor of Medicine  
UCSD School of Medicine  
9500 Gilman Dr. BSB4028  
La Jolla, CA 92093-0613J  
tel (858) 534-3630  
lab (858) 534-1317  
fax (858) 534-0522  
fvillarr@ucsd.edu

## Electronic Supplementary Material

**Supplemental Table S1. Study subject characteristics**

| Characteristic                  | 50 mg q.d. |       | 50 mg b.i.d. |       |
|---------------------------------|------------|-------|--------------|-------|
|                                 | Mean       | SEM   | Mean         | SEM   |
| Sex (Male -n) <sup>a</sup>      | 4          | 44    | 4            | 50    |
| Age (years) <sup>b</sup>        | 33         | 23-68 | 25.5         | 22-45 |
| Systolic blood pressure (mmHg)  | 123        | 4.3   | 116.5        | 3     |
| Diastolic blood pressure (mmHg) | 74         | 2.2   | 67.4         | 2.5   |
| Heart rate (beats per minute)   | 68         | 3.3   | 61           | 6     |
| BMI (kg/m <sup>2</sup> )        | 27.2       | 3.7   | 23.2         | 1     |

Data is expressed as mean and SEM.

q.d. once a day; b.i.d, twice a day.

<sup>a</sup> Sex is male number and percentage.

<sup>b</sup> Age is median and range.

**Supplemental Table S2. Laboratory data from subjects in part 2**

| Parameters                             | 50 mg q.d. |       |       |       | 50 mg b.i.d |       |       |                  |
|----------------------------------------|------------|-------|-------|-------|-------------|-------|-------|------------------|
|                                        | Day 1      | Day 5 | Day 1 | Day 5 | Day 1       | Day 5 | Day 1 | Day 5            |
|                                        | Mean       | SEM   | Mean  | SEM   | Mean        | SEM   | Mean  | SEM              |
| White cell count – per mm <sup>3</sup> | 6.3        | 1.3   | 5.4   | 0.4   | 5.7         | 0.9   | 4.7   | 1.8              |
| Hemoglobin – g/dL                      | 13.4       | 1.3   | 13.1  | 1.6   | 14.3        | 0.67  | 13.8  | 1.3              |
| Hematocrit - %                         | 39         | 3.6   | 39    | 3.6   | 42          | 2.2   | 40    | 3.3              |
| Mean corpuscular volume – fL           | 91.2       | 2.6   | 91.5  | 2.8   | 90          | 4.2   | 89.4  | 5                |
| Platelet count – per mm <sup>3</sup>   | 244.5      | 31.5  | 241.8 | 38.1  | 254         | 12.8  | 218   | 32*              |
| Sodium – Meq/L                         | 140.5      | 1.3   | 140.3 | 0.96  | 141         | 1.9   | 141   | 2.1              |
| Potassium - Meq/L                      | 4.1        | 0.26  | 4.2   | 0.26  | 4.3         | 0.3   | 4.3   | 0.3              |
| Bicarbonate - Meq/L                    | 30.3       | 1.7   | 29.3  | 1.9   | 30          | 3.3   | 28    | 1.8              |
| Blood urea nitrogen – mg/dL            | 15.3       | 1.3   | 12.8  | 3.3   | 14.3        | 2.5   | 14    | 2.9              |
| Creatinine – mg/dL                     | 0.78       | 0.03  | 0.73  | 0.15  | 0.85        | 0.09  | 0.78  | 0.08             |
| Glucose – mg/dL                        | 86.5       | 8.5   | 82.3  | 5.6   | 86.5        | 18.9  | 86    | 4.7              |
| Aspartate aminotransferase – U/L       | 21.3       | 3.8   | 20.2  | 2.8   | 24.5        | 4.8   | 23.5  | 2.4              |
| Alanine aminotransferase – U/L         | 16.3       | 6.9   | 14.5  | 4.9   | 17.8        | 3.6   | 18    | 3.2              |
| Total Bilirubin – mg/dL                | 0.65       | 0.06  | 0.65  | 0.13  | 0.78        | 0.2   | 0.75  | 0.3              |
| Protein – mg/dL                        | 6.9        | 0.2   | 6.8   | 0.6   | 7.4         | 0.3   | 6.9   | 0.5              |
| Alkaline Phosphatase – U/L             | 56         | 19    | 51    | 15.4  | 64.8        | 7.3   | 58.3  | 8.6 <sup>a</sup> |
| Total Cholesterol – mg/L               | 175        | 49.7  | 172   | 47    | 144         | 32    | 140   | 29               |
| Low density lipoprotein – mg/L         | 104        | 35    | 101   | 31    | 77          | 28    | 80    | 29               |
| High density lipoprotein – mg/L        | 57         | 15    | 57    | 16    | 48          | 7     | 50    | 4                |
| Triglycerides – mg/L                   | 69         | 20    | 74    | 20    | 95          | 46    | 55    | 22               |

q.d., once a day; b.i.d., twice a day.

<sup>a</sup> p<0.05

**Supplemental Table S3. Pharmacokinetic study protocol**

| <b>Time</b> | <b>Procedures performed</b>                                              |
|-------------|--------------------------------------------------------------------------|
| 0           | Baseline vital signs and blood obtained.<br>(-)-Epicatechin administered |
| +0.5 Hours  | Vital signs and blood obtained.                                          |
| +1 Hour     | Vital signs and blood obtained.                                          |
| +1.5 Hours  | Vital signs obtained                                                     |
| +2 Hours    | Vital signs and blood obtained.                                          |
| +4 Hours    | Vital signs and blood obtained.                                          |
| +6 Hours    | Vital signs and blood obtained.<br>Electrocardiogram performed           |

**Supplemental Figure S1.** Time course of plasma follistatin levels recorded after a single 50 mg (-)-Epicatechin ((-)-EPI) dose or repeated 5 day 50 mg b.i.d. dosing. Data are mean and SEM (n=4).

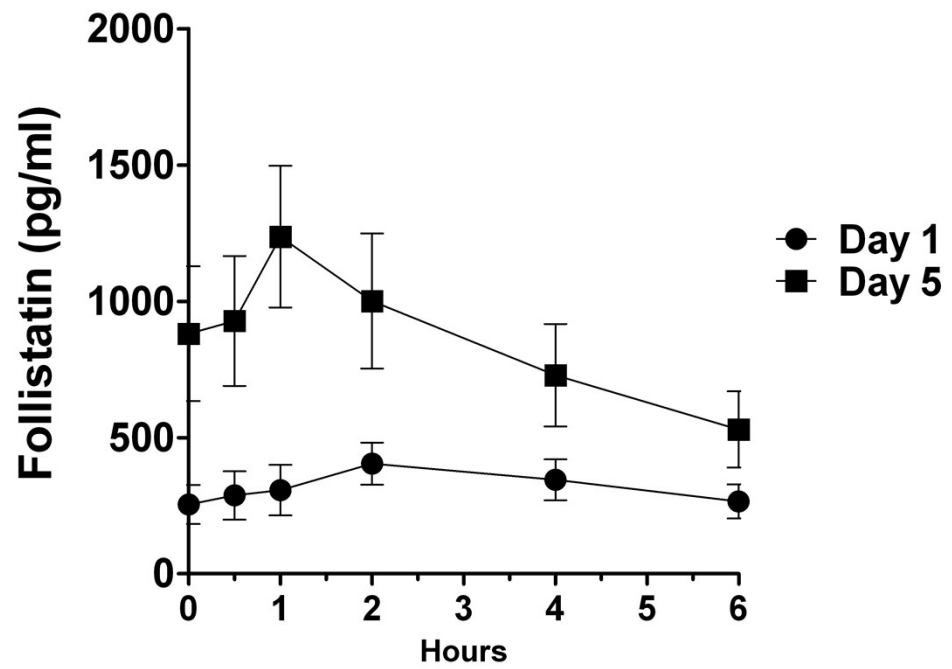

**Supplemental Figure S2.** Systolic blood pressure versus time following single doses of (-)-epicatechin ((-)-EPI). There were no significant differences on systolic and diastolic blood pressure (data not shown) after 50, 100 and 200 mg pure (-)-EPI administration.

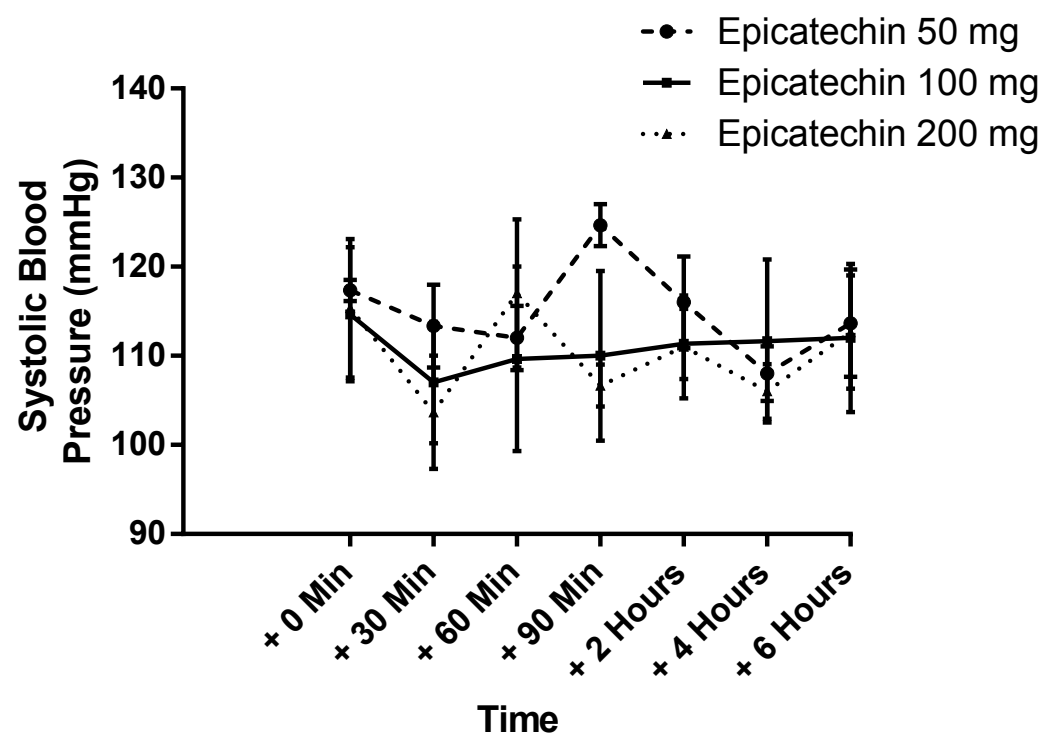

**Supplemental Figure S3.** Systolic blood pressure versus time in subjects receiving (-)-epicatechin 50 mg q.d. and b.i.d. daily on day 1 and day 5. There were no significant differences on systolic and diastolic blood pressure (data not shown) on day 1 vs. day 5 in once daily (q.d.) and twice daily (b.i.d.) groups.

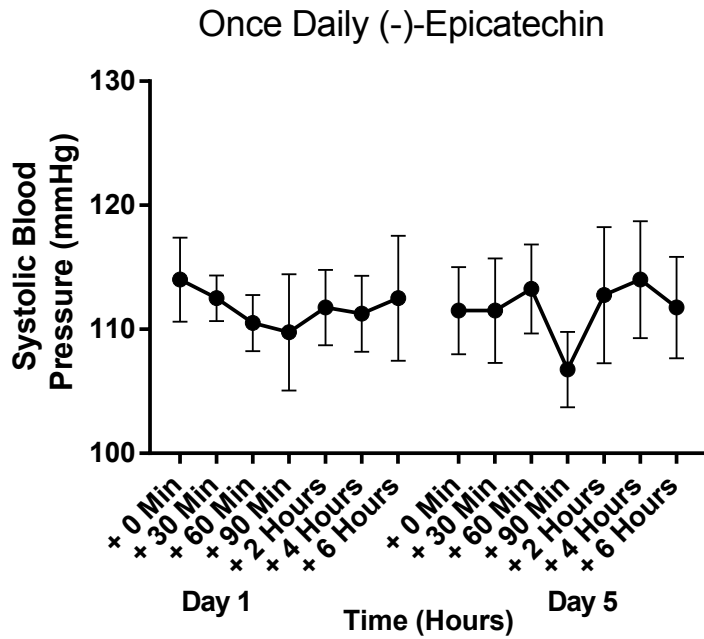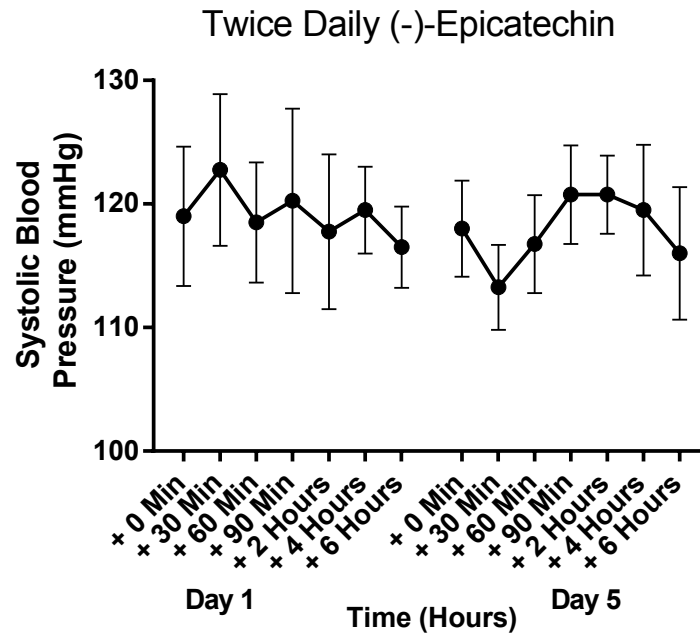

Supplement: c4fo00596a1.pdf [file c4fo00596a1.pdf]
